# Supplementary material
Source: HighWire-hosted journal article supplement (https://bmjopen.bmj.com/content/11/12/e049487)
Supplement: inline-supplementary-material-1 [file inline-supplementary-material-1.pdf]

**Supplementary Table 1 Matched reimbursement codes per type 2 diabetes-related complication**

| Disease group                                                | Reimbursement codes (DBC's)                                                                                                                                                                                                                                                                                                                                                                                                                                                                                                                                                         |
|--------------------------------------------------------------|-------------------------------------------------------------------------------------------------------------------------------------------------------------------------------------------------------------------------------------------------------------------------------------------------------------------------------------------------------------------------------------------------------------------------------------------------------------------------------------------------------------------------------------------------------------------------------------|
| <b>Macrovascular type 2 diabetes – related complications</b> |                                                                                                                                                                                                                                                                                                                                                                                                                                                                                                                                                                                     |
| Acute Coronary Syndrome                                      | Unstable Angina Pectoris (0320.203); ST-elevated myocardial infarction (0320.204); Non-ST-elevated myocardial infarction (0320.205); Instable AP, myocardial infarction (0313.102); Symptomatic ischemic heart disease, not in 0313.102 (0313.101)                                                                                                                                                                                                                                                                                                                                  |
| Stroke                                                       | Cerebrovascular Accident (0327.313); Cerebrovascular Accident/ Transient Ischemic Attack (0313.121); Intracerebral hemorrhage (0330.1102); Intracranial hemorrhage (sub- / epidural) (0330.1103); Stroke (0330.1111); Cerebrovascular Accident (8418.101); Cerebrovascular Accident/ Transient Ischemic Attack (0335.263); Transient Ischemic Attack (including amaurosis fugax) (0330.1112)                                                                                                                                                                                        |
| Heart failure                                                | Acute heart failure (0320.301); Chronic heart failure (0320.302); Decompensatio cordis (0335.262); Decompensatio cordis (0313.107)                                                                                                                                                                                                                                                                                                                                                                                                                                                  |
| <b>Microvascular type 2 diabetes – related complications</b> |                                                                                                                                                                                                                                                                                                                                                                                                                                                                                                                                                                                     |
| Diabetic mono/polyneuropathy                                 | Nervous system and sensory disorders (0335.251); Peripheral nerve injury, nerve disorders (0327.413)                                                                                                                                                                                                                                                                                                                                                                                                                                                                                |
| Diabetic eye complications                                   | Cataract (0301.554); Anterior uveitis (0301.502); Posterior uveitis / Panuveitis (0301.503); Retinal defect / retinal detachment (0301.654); Subretinal neovascularization (0301.704); Maculopathy (0301.705); Macular degeneration (0301.707); Non-proliferative diabetic retinopathy (0301.754); Proliferative diabetic retinopathy (0301.755); Other pathology diabetic retinopathy (0301.759)                                                                                                                                                                                   |
| Diabetic foot/peripheral angiopathy                          | Amputation (0327.200); Amputation through or above the elbow (0327.211); Lower arm / hand amputation, excluding fingers (0327.212); Finger(s) amputation (0327.213); Amputation of upper extremity, not specified (0327.214); Amputation of upper leg and higher (0327.215); Foot, lower leg and knee amputation (0327.216); Amputation of toe(s) (0327.217); Amputation of lower extremity, not specified (0327.218); Amputation of upper leg and higher (8418.401); Foot and/or lower leg and/or toe(s) amputation (8418.402); Amputation of upper extremity (8418.403); Diabetic |

foot (305.2065); Diabetic foot (0303.432); Other peripheral vascular diseases (0303.439); PAOD arm (0303.0412); PAOD 2, claudicatio intermittens (0303.0418); PAOD 3, rest pain (0303.0419); PAOD 4, gangrene (0303.0420)

Diabetic kidney disease    Kidney transplant, recipient (0313.076); Kidney and pancreatic transplant, recipient (0313.078); Chronic renal failure, eGFR 30-60 ml/min (0313.324), Chronic renal failure, eGFR <30 ml/min (0313.325); Continuous ambulatory peritoneal dialysis (CAPD) (0313.331); Automatic peritoneal dialysis (APD) (0313.332); Chronic hemodialysis at home (0313.336); Chronic hemodialysis in institution (0313.339)

---

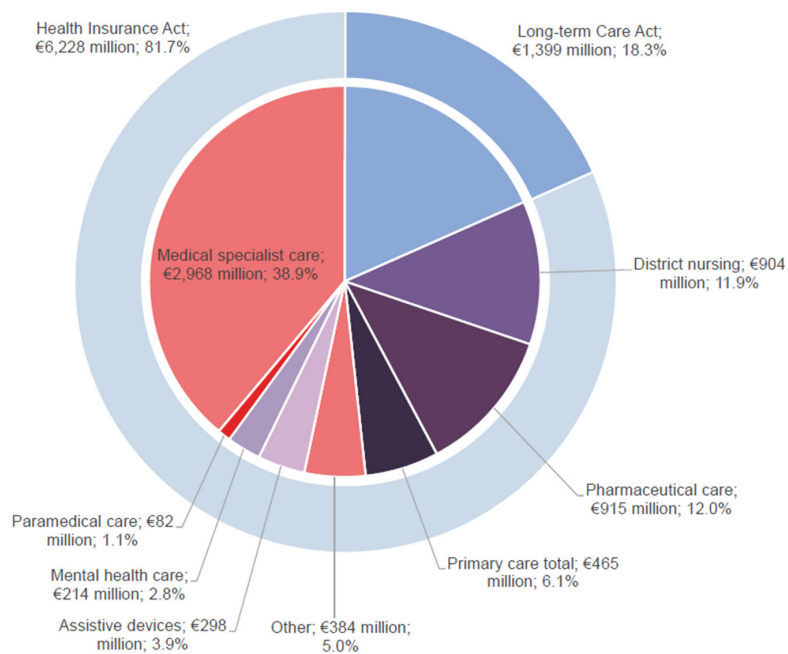

**Supplementary Figure 1 Healthcare expenditures of the type 2 diabetes population in 2016**

**Supplementary Table 2 Mean and median expenditures type 2 diabetes related-complications per treated patient in 2016-2018 (€)**

|                                          | 2016<br>Mean<br>expenditures<br>per patient ±<br>SD <sup>a</sup> | 2016<br>Median per<br>patient<br>expenditures<br>(P5; P95) <sup>a</sup> | 2017<br>Mean<br>expenditures<br>per patient ±<br>SD <sup>a</sup> | 2017<br>Median per<br>patient<br>expenditures<br>(P5; P95) <sup>a</sup> | 2018<br>Mean<br>expenditures<br>per patient ±<br>SD <sup>a</sup> | 2018<br>Median per patient<br>expenditures (P5;<br>P95) <sup>a</sup> |
|------------------------------------------|------------------------------------------------------------------|-------------------------------------------------------------------------|------------------------------------------------------------------|-------------------------------------------------------------------------|------------------------------------------------------------------|----------------------------------------------------------------------|
| Macrovascular T2DM-related complications | 4,739.6±7,510.0                                                  | 2,301.8 (208.3; 19,453.1)                                               | 4,846.5±103.5                                                    | 2,327.9 (199.8; 19,049.2)                                               | 4922.9±7,763.3                                                   | 2,351.5 (200.3; 19,848.7)                                            |
| HF                                       | 3,118±5,261                                                      | 689 (208; 12,677)                                                       | 3,090±5,100                                                      | 673 (200; 12,873)                                                       | 3,160±5,296                                                      | 673 (200; 13,235)                                                    |
| Stroke                                   | 5,967±10,215                                                     | 2,418 (229; 26,980)                                                     | 6,348±10,749                                                     | 2,430 (215; 28,514)                                                     | 6,287±10,587                                                     | 2,472 (221; 28,830)                                                  |
| ACS                                      | 5,479±3,988                                                      | 5,548 (524; 12,654)                                                     | 5,530±3,842                                                      | 5,924 (359; 12,165)                                                     | 5,863±4,139                                                      | 6,100 (360; 13,496)                                                  |
| Microvascular T2DM-related complications | 1,907.7±80.9                                                     | 393.9 (80.9; 7,146.7)                                                   | 1,957.3±80.1                                                     | 401.0 (80.1; 7,200.0)                                                   | 2,094.4±6,818.2                                                  | 447.8 (82.1; 7,768.2)                                                |
| Diabetic eye complications               | 820±1,247                                                        | 161 (81; 3,031)                                                         | 843±1,272                                                        | 165 (80; 3,150)                                                         | 908±1,332                                                        | 178 (82; 3,512)                                                      |
| Diabetic foot/peripheral angiopathy      | 4,671±9,255                                                      | 585 (124; 20,513)                                                       | 4,817±9,680                                                      | 588 (124; 21,739)                                                       | 5,013±9,922                                                      | 608 (126; 22,133)                                                    |
| Diabetic kidney disease                  | 3,461±12,020                                                     | 677 (226; 13,654)                                                       | 3,479±11,857                                                     | 679 (230; 16,187)                                                       | 3,848±12,430                                                     | 689 (230; 21,200)                                                    |
| Diabetic mono/polyneuropathy             | 1,608±6,066                                                      | 458 (229; 3,886)                                                        | 1,438±6,135                                                      | 430 (215; 3,543)                                                        | 1,462±5,323                                                      | 443 (221; 4,020)                                                     |
